# Supplementary material for: BODIPY–vinyl dibromides as triplet sensitisers for photodynamic therapy and triplet–triplet annihilation upconversion
Source: Royal Society of Chemistry journal article supplement (doi:10.1039/d1cc01881g), 2021-01-01
Supplement: d1cc01881g1.pdf [file d1cc01881g1.pdf]

## Supporting Information

### **BODIPY-vinyl dibromides as highly efficient triplet sensitizers for singlet oxygen generation, photodynamic therapy and Triplet triplet annihilation up conversion**

Suay Dartar<sup>a</sup>, Muhammed Üçüncü<sup>b</sup>, Erman Karakuş<sup>c</sup>, Yugi Hou<sup>d</sup>, Jianzhang Zhao<sup>\*d</sup> and Mustafa Emrulloğlu<sup>e\*</sup>

<sup>a</sup>Department of Chemistry, Faculty of Science, İzmir Institute of Technology, İzmir, Turkey.

<sup>b</sup>Department of Analytical Chemistry, Faculty of Pharmacy, İzmir Katip Celebi University, İzmir, Turkey

<sup>c</sup>Organic Chemistry Laboratory, Chemistry Group, The Scientific & Technological Research Council of Turkey, National Metrology Institute (TUBITAK-UME), Kocaeli, Turkey

<sup>d</sup>State Key Laboratory of Fine Chemicals, School of Chemical Engineering, Dalian University of Technology, E 208 Western Campus, 2 Ling-Gong Road, Dalian 116012, P.R. China.

<sup>e</sup>Department of Photonics, Faculty of Science, İzmir Institute of Technology, Urla, 35430, İzmir, Turkey

#### Table of Contents

|                                                      |    |
|------------------------------------------------------|----|
| General Methods.....                                 | 2  |
| Synthesis of <b>BOD-1</b> and <b>BOD-2</b> .....     | 3  |
| Synthesis of <b>BOD-1</b> .....                      | 3  |
| Synthesis of <b>BOD-2</b> .....                      | 4  |
| Determination of Quantum Yields.....                 | 4  |
| Singlet Oxygen Trap Experiments.....                 | 4  |
| Singlet Oxygen Quantum Yield Calculations.....       | 5  |
| TTA Upconversion Calculations .....                  | 6  |
| Cell Studies .....                                   | 7  |
| Cell Viability .....                                 | 7  |
| Cell Imaging .....                                   | 8  |
| NMR Spectra .....                                    | 9  |
| <sup>1</sup> H NMR of <b>BOD-1</b> .....             | 9  |
| <sup>13</sup> C NMR of <b>BOD-1</b> .....            | 9  |
| <sup>1</sup> H NMR of <b>BOD-2</b> .....             | 10 |
| <sup>13</sup> C NMR of <b>BOD-2</b> .....            | 10 |
| HRMS Spectrum of <b>BOD-1</b> and <b>BOD-2</b> ..... | 11 |
| References.....                                      | 12 |

## General Methods

All reagents were purchased from commercial suppliers (Aldrich and Merck) and used without any purification.  $^1\text{H}$  NMR and  $^{13}\text{C}$  NMR were measured on a Varian VNMRJ 400 Nuclear Magnetic Resonance Spectrometer. Mass spectrometry analysis was measured on Thermo Fisher Scientific Q-Exactive HRMS. UV absorption spectra and Fluorescence emission spectra were obtained using HORIBA Duetta, the two-in-one Fluorescence and absorbance spectrometer using 10.0 mm path length quartz cuvettes (2.0 mL volume). In singlet oxygen measurements 1,3-Diphenylisobenzofuran was used as a singlet oxygen scavenger and was purchased from Sigma-Aldrich. Fluorescence lifetimes were measured by a time-correlated single photon counting (TCSPC) system using a Edinburgh FLS920 spectrophotometer with excitation wavelength at 480 nm for **BOD-1** and 500 nm for **BOD-2** (pulse width: < 200 ps). The lifetime values were computed by the F900 software. The nanosecond transient absorption spectra and the relative decay curves were measured on LP980 laser flash photolysis spectrometer (Edinburgh Instruments Ltd., UK) with a nanosecond pulsed laser (Opolette<sup>TM</sup> 355II+UV nanosecond pulsed laser. OPOTEK, USA), and the signal was digitized on a Tektronix TDS 3012B oscilloscope. The triplet state lifetime values (by monitoring the decay trace of the transients) were obtained with the L900 software. All samples in flash photolysis experiments were deaerated with  $\text{N}_2$  for ca. 15 min before measurement. The upconverted fluorescence spectra were recorded with RF-5301PC spectrofluorometer (Shimadzu Ltd., Japan). For fluorescence imaging were recorded with Zeiss Axio Observer.

## Synthesis of BOD-1 and BOD-2

The synthesis pathway for **BOD-1** and **BOD-2** were shown in Scheme 1.

**2-formyl Bodipy**<sup>1</sup>, **2,6-diformyl Bodipy**<sup>2</sup>, **BOD-1**<sup>3</sup> and **BOD-2**<sup>3</sup> were synthesized by using literature procedure.

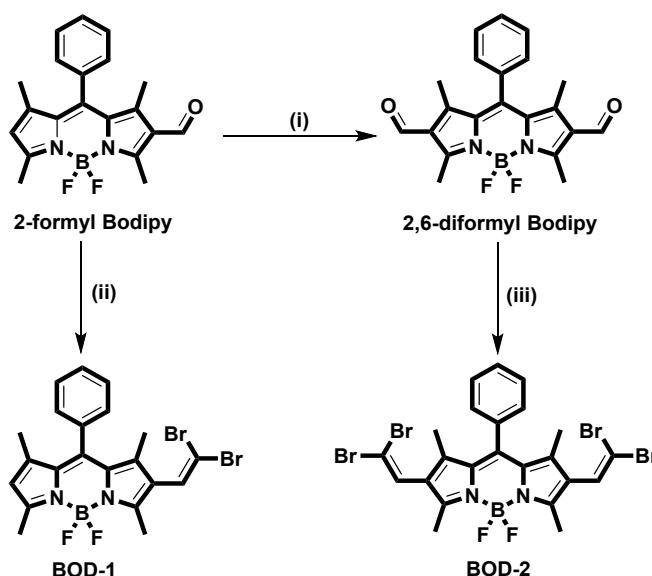

**Scheme 1.** Synthesis pathway of **BOD-1** and **BOD-2** (i) POCl<sub>3</sub>, DMF in 1,2-DCE at 60°C. (ii) CBr<sub>4</sub>, PPh<sub>3</sub> in DCM at 0°C. (iii) CBr<sub>4</sub>, PPh<sub>3</sub> in DCM at 0°C.

## Synthesis of BOD-1

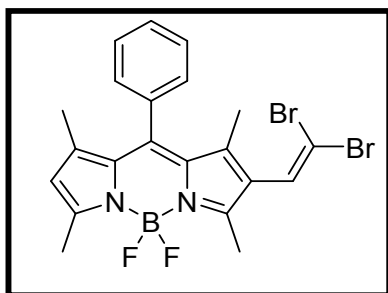

In the first part of the reaction, to a carbontetrabromide (0.34 mmol, 2 equiv.) in 0.35 ml dry DCM, **2-formyl BODIPY** (0.17 mmol, 1 equiv.) in 0.35 ml DCM was added dropwise at 0°C very slowly. Then, triphenylphosphine (0.68 mmol, 4 equiv.) was dissolved in 0.35 ml dry DCM and added to reaction medium at 0°C. After addition, cooling bath was removed and the reaction was stirred at room temperature for 3 hours. Color of the reaction turned from dark orange to dark purple. After completion of the reaction, extraction was done with dichloromethane (3x 30 ml) and dried over MgSO<sub>4</sub>. Solvent was evaporated in and the resultant compound purified by column chromatography (30 mg, 35% yield). <sup>1</sup>H NMR (400 MHz, CDCl<sub>3</sub>) δ ppm: 7.49 (s, 3H), 7.28 (s, 2H), 7.11 (s, 1H), 6.01 (s, 1H), 2.56 (s, 3H), 2.52 (s, 3H), 1.37 (s, 3H), 1.29 (s, 3H). <sup>13</sup>C NMR (100 MHz, CDCl<sub>3</sub>) δ ppm: 157.2, 157.0, 152.2, 144.4, 142.1, 139.1, 134.8, 130.7, 129.2, 127.8, 122.0, 94.5, 14.7, 14.5, 13.8, 13.2. Calcd. for C<sub>21</sub>H<sub>19</sub>BBr<sub>2</sub>F<sub>2</sub>N<sub>2</sub>: 530.98553 [M+Na]<sup>+</sup>, Found: 530.98779 [M+Na]<sup>+</sup>.

## Synthesis of BOD-2

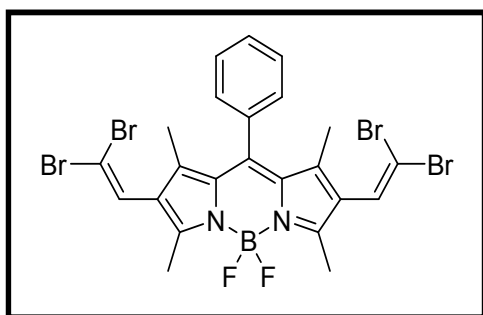

In the first part of the reaction, to a carbon tetrabromide (0.496 mmol, 4 equiv.) in 0.35 ml dry DCM, **2,6-diformyl BODIPY** (0.124 mmol, 1 equiv.) in 0.35 ml DCM was added dropwise at 0°C very slowly. Then, triphenylphosphine (0.992 mmol, 8 equiv.) was dissolved in 0.35 ml dry DCM and added to reaction medium at 0°C. After addition, cooling

bath was removed and the reaction was stirred at room temperature for 3 hours. After the completion of reaction, extraction was done with dichloromethane (3x 30 ml) and dried over MgSO<sub>4</sub>. Solvent was evaporated in and the resultant compound purified by column chromatography (30 mg, 35%). <sup>1</sup>H NMR (400 MHz, CDCl<sub>3</sub>) δ ppm: 7.54 – 7.50 (m, 3H), 7.32 – 7.27 (m, 2H), 7.11 (s, 2H), 2.53 (s, 6H), 1.29 (s, 6H). <sup>13</sup>C NMR (100 MHz, CDCl<sub>3</sub>) δ ppm: 154.0, 142.6, 140.4, 134.6, 131.3, 130.3, 129.4, 129.3, 128.5, 127.8, 95.0, 13.9, 13.4. Calcd. for C<sub>23</sub>H<sub>19</sub>BBr<sub>4</sub>F<sub>2</sub>N<sub>2</sub>: 714,81996 [M+Na]<sup>+</sup>, Found: 714.82324 [M+Na]<sup>+</sup>.

## Determination of Quantum Yields

Fluorescence quantum yields of **BOD-1** and **BOD-2** were determined by using optically matching solutions of Rhodamine 6G ( $\Phi_F=0.95$  in ethanol) as a standard.<sup>4</sup> The quantum yield was calculated according to the equation;

$$\Phi_{F(X)} = \Phi_{F(S)} (A_S F_X / A_X F_S) (n_X / n_S)^2$$

Where  $\Phi_F$  is the fluorescence quantum yield, A is the absorbance at the excitation wavelength, F is the area under the corrected emission curve, and n is the refractive index of the solvents used. Subscripts S and X refer to the standard and to the unknown, respectively.

## Singlet Oxygen Trap Experiments

For singlet oxygen measurements indirect method was performed by using 1,3-diphenylisobenzofuran (**DPBF**) which is a singlet oxygen scavenger in DMSO. It was purchased from a Sigma-Aldrich. In a typical procedure for the detection of singlet oxygen generation by using trap molecules, **BOD-1** (5  $\mu$ M) and **DPBF** (25  $\mu$ M) were mixed in O<sub>2</sub> bubbled CH<sub>2</sub>Cl<sub>2</sub>. Initially several dark measurements were taken followed by irradiation of the mixture at absorption maximum of a sensitizer. Absorbance decay of **DPBF** was monitored suggesting singlet oxygen generation in the presence of light and **BOD-1**. Same procedure was

performed for **BOD-2**. Measurements were performed using 525 nm LED ( $3.3 \text{ mW/cm}^2$ ) and samples were irradiated with the light source from a 15 cm distance.

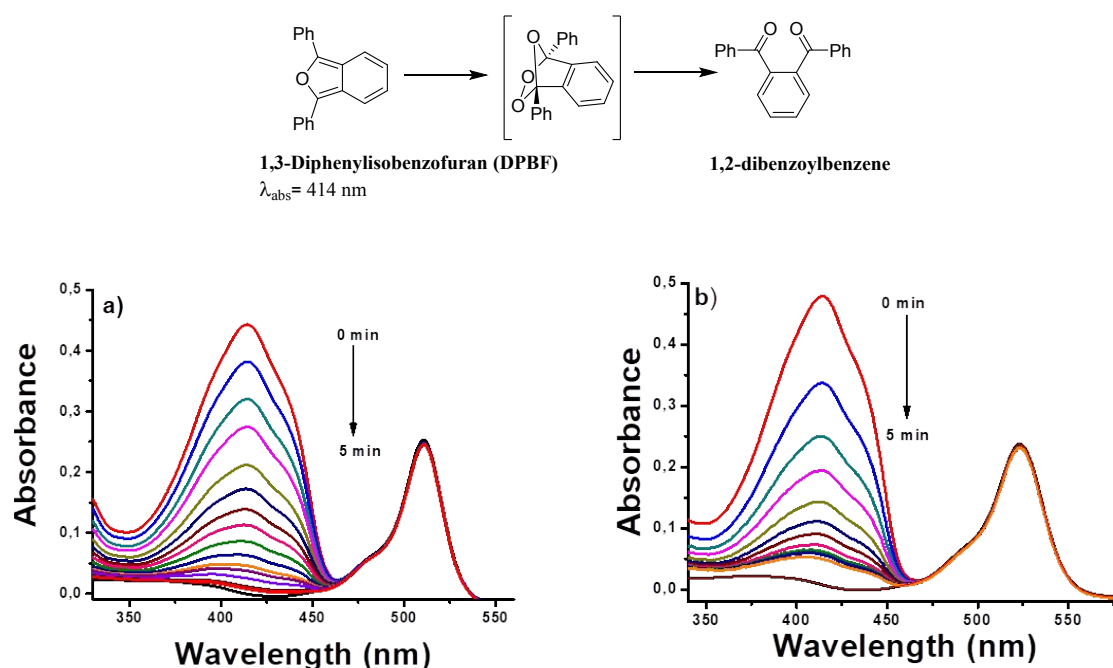

**Figure S1.** Singlet oxygen mediated bleaching of DPBF (25  $\mu\text{M}$ ) in the presence of a) **BOD-1** (5  $\mu\text{M}$ ) b) **BOD-2** (5  $\mu\text{M}$ ) in  $\text{CH}_2\text{Cl}_2$ .

## Singlet Oxygen Quantum Yield Calculations

Relative singlet oxygen quantum yields were calculated by using **2I-BOD** as a reference whose singlet oxygen quantum yield is 0.79 in  $\text{CH}_2\text{Cl}_2$ .<sup>5</sup> Singlet oxygen trap molecule (**DPBF**) and photosensitizers (**BOD-1 and BOD-2**) were placed into cuvette containing oxygen saturated  $\text{CH}_2\text{Cl}_2$ . Solution was kept in dark and mixed by micropipette until absorbance readings were stable. After stabilization, absorbance readings were recorded for 5 minutes by exposing cuvette to light (525 nm) for 60 seconds (from 15 cm distance). Absorbance readings of **DPBF** at its absorbance maxima were recorded against time and recorded graph is given below.

Singlet oxygen quantum yields were calculated according to the equation:

$$\phi\Delta(\text{PS}) = \phi\Delta(\text{R}) \times m(\text{PS}) / m(\text{R}) \times F(\text{R}) / F(\text{PS}) \times \text{PF}(\text{R}) / \text{PF}(\text{PS})$$

where PS and R designate photosensitizers and reference dye (**2I-BOD**) respectively.  $m$  is the slope of difference in change in absorbance of DPBF at absorbance maxima with the irradiation time.  $F$  is the absorption correction factor, which is given as  $F=1-10^{-\text{OD}}$ , and PF is absorbed photonic flux.

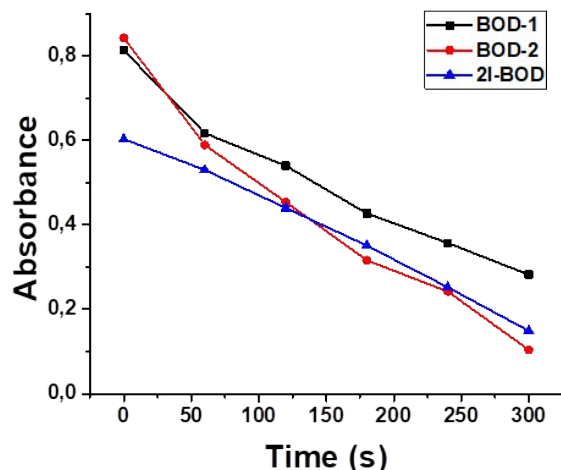

**Figure S2.** Relative singlet oxygen quantum yield experiment. Absorbance decreases of **DPBF** (25  $\mu\text{M}$ ) at absorbance maxima with time in  $\text{CH}_2\text{Cl}_2$  in the presence of compound **BOD-1** (5  $\mu\text{M}$ ) and **BOD-2** (5  $\mu\text{M}$ ) as photosensitizers and **2I-BOD** (5  $\mu\text{M}$ ) as reference.

## TTA Upconversion Calculations

A continuous wave (cw) 510 nm laser was used to excite the sample solutions. The upconverted fluorescence spectra were recorded with RF-5301PC spectrofluorometer (Shimadzu Ltd., Japan). In order to repress the laser scattering, a beam dump was put behind the cuvette. All the samples were deaerated with  $\text{N}_2$  for ca. 15 min and kept in  $\text{N}_2$  atmosphere during the measurement.

The upconversion quantum yields ( $\Phi_{\text{UC}}$ ) were determined with 2,6-diiodo-1,3,5,7-tetramethyl-8-phenyl-BODIPY (**2I-BOD**) as the external standard ( $\Phi_{\text{F}} = 2.7\%$  in acetonitrile). The values were calculated with the equation, where  $\Phi$ , A, I and  $\eta$  represent the quantum yield, absorbance, integrated photoluminescence intensity and the refractive index of the solvents, respectively. Symbols with 'std' and 'sam' stand the corresponding parameter for the standard and sample.

$$\Phi_{\text{UC}} = 2\Phi_{\text{std}} \left( \frac{1 - 10^{-A_{\text{std}}}}{1 - 10^{-A_{\text{sam}}}} \right) \left( \frac{I_{\text{sam}}}{I_{\text{std}}} \right) \left( \frac{\eta_{\text{sam}}}{\eta_{\text{std}}} \right)^2$$

## Cell Studies

### Cell Viability

A549 Human Lung Adeno carcinoma cells were seeded in 96-well plates at a density of  $1 \times 10^4$  cells per well with 100  $\mu$ L culture and incubated for 24 hours at 37 °C under 5% CO<sub>2</sub>. After the overnight incubation, cell medium was removed and replaced with complete medium supplemented with varying concentration of **BOD-1** and **BOD-2**. The experimental group of the cells were illuminated with a yellow light source (525 nm, distance between light source and cells: 15 cm) for 60 min. Then cells were replaced new media and incubated another 24 hours. At the end of incubation periods, medium of the cells were removed and cells were washed by pre-warmed phosphate buffered saline (PBS) to remove any trace of compounds and to prevent color interference during optical density (OD) determination. MTT solution (0.5 mg/mL in PBS) was added into each well and incubated for 4 hours. After the incubation time plates were centrifuged at 1800 rpm for 10 minutes at room temperatures to avoid accidental removal of formazan crystals. Crystals were dissolved with 100  $\mu$ L DMSO. The absorbance was determined at 540 nm.

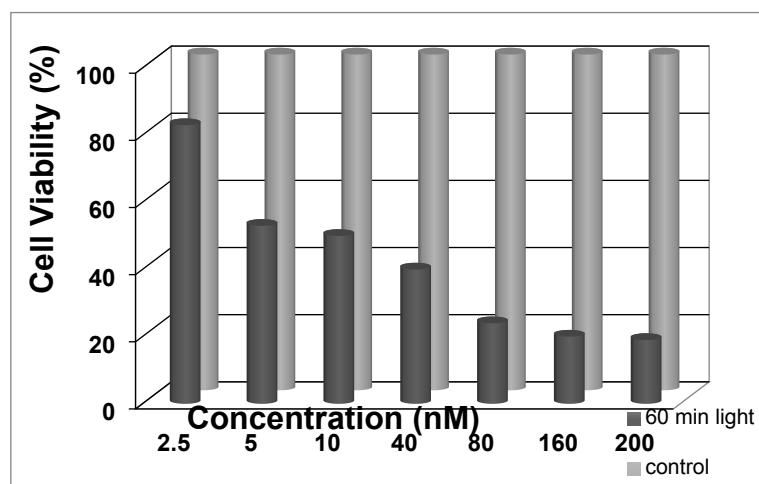

**Figure S3.** Cell viability of A549 cells after treatment with **BOD-1** at different concentrations. Control group was incubated only with the cell culture medium.

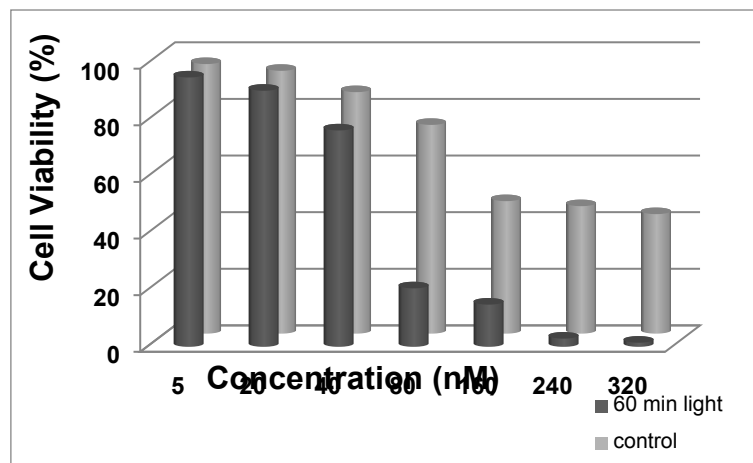

**Figure S4.** Cell viability of A549 cells after treatment with **BOD-2** at different concentrations. Control group was incubated only with the cell culture medium.

## Cell Imaging

A549 Human Lung Adenocarcinoma cell lines were grown in DMEM supplemented with 10% FBS (fetal bovine serum) in an atmosphere of 5% CO<sub>2</sub> at 37°C. The cells were plated on 12 mm cover glasses in 6-well plate and allowed to grow for 24h. Before the experiments, the cells were washed with PBS buffer, and then the cells were incubated with **BOD-1** (10 μM) for 30 min at 37°C. Then cells were rinsed with PBS three times and DAPI for 10 min at 37°C. After that cells were washed with PBS three times. Then, the fluorescence images were acquired through a Zeiss Axio fluorescence microscope.

## Determination of Photostability of BOD-1 and BOD-2

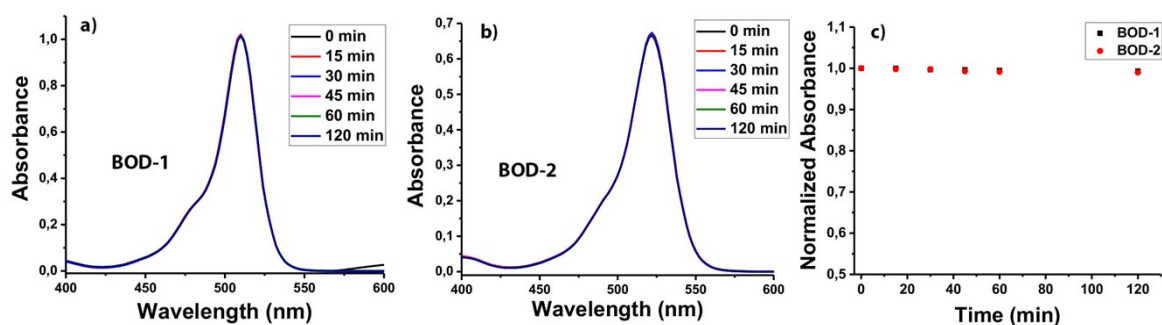

**Figure S5.** Absorbance spectra of a) BOD-1 and b) BOD-2 during illumination at 530 nm 10mW/cm<sup>2</sup> for 120 min. c) normalized absorbance change of BOD-1 and BOD-2



# NMR Spectra

## <sup>1</sup>H-NMR of BOD-1

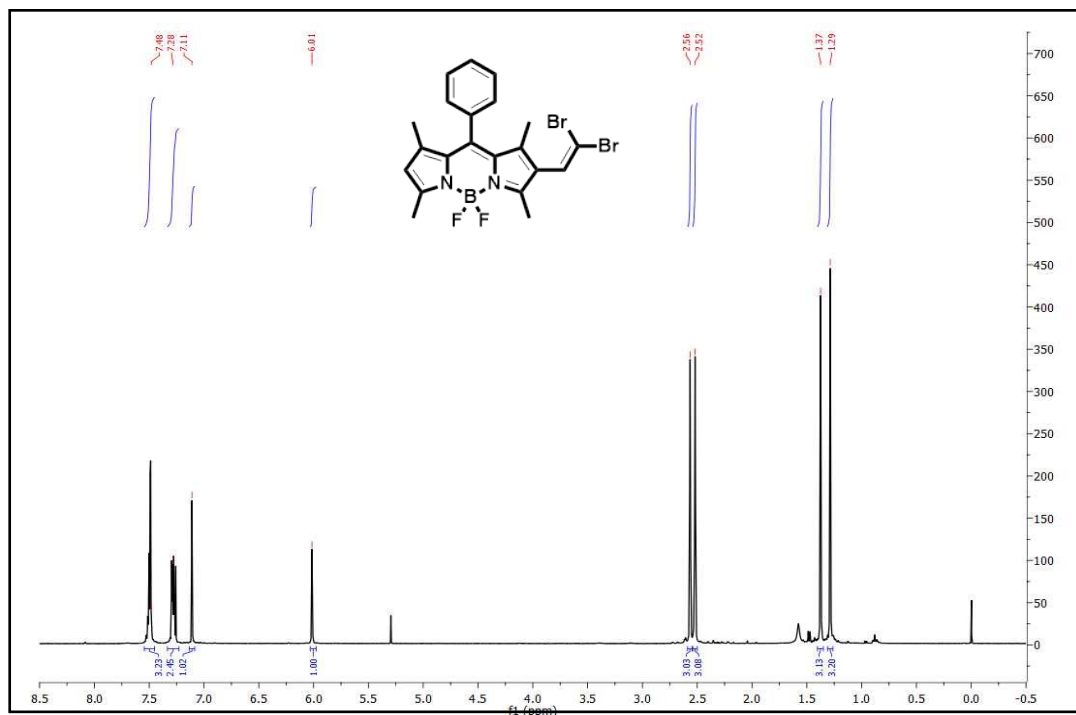

## <sup>13</sup>C-NMR of BOD-1

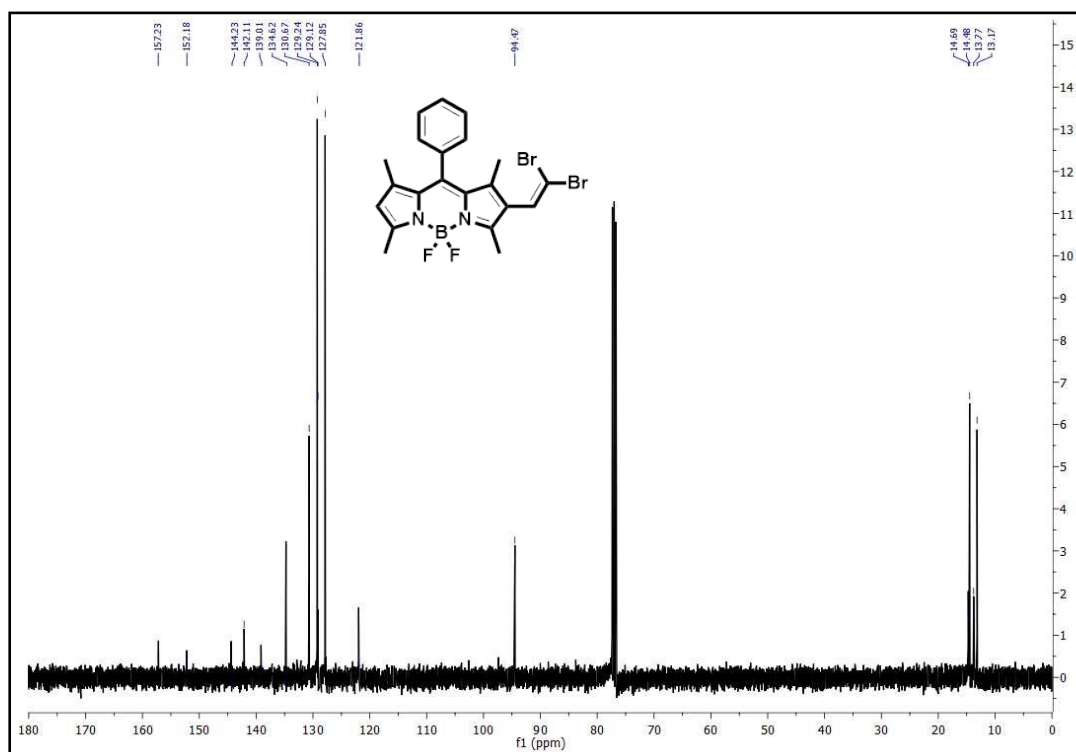

## $^1\text{H-NMR}$ of **BOD-2**

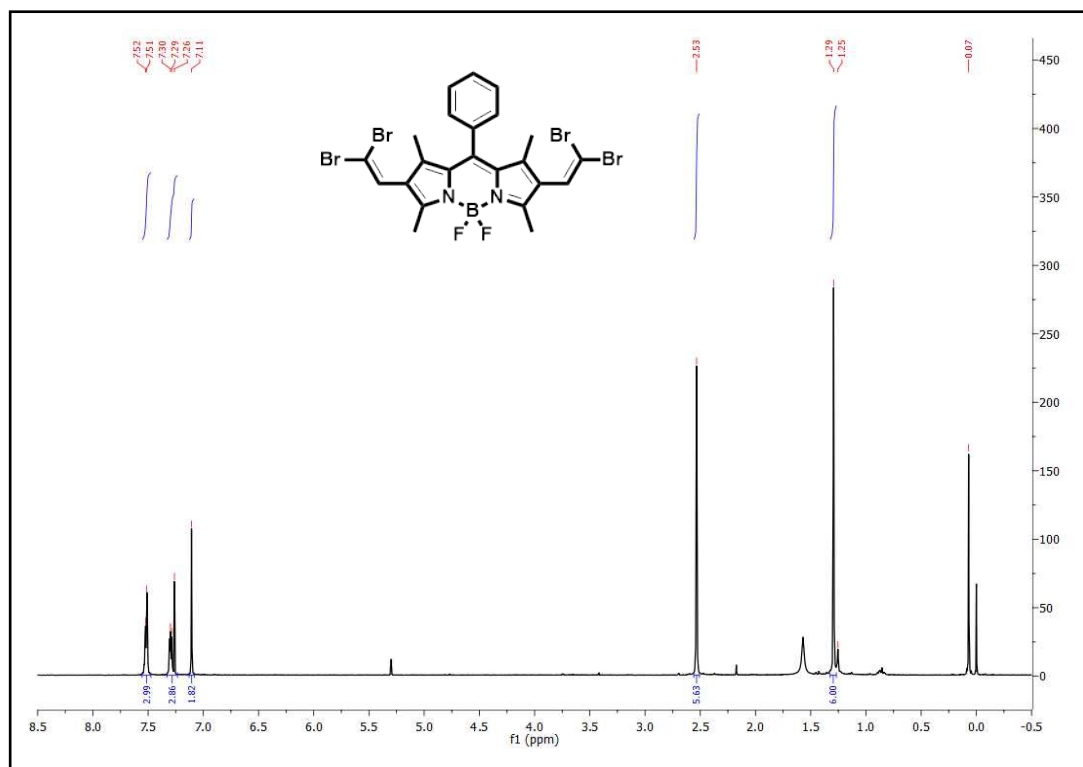

## $^{13}\text{C-NMR}$ of **BOD-2**

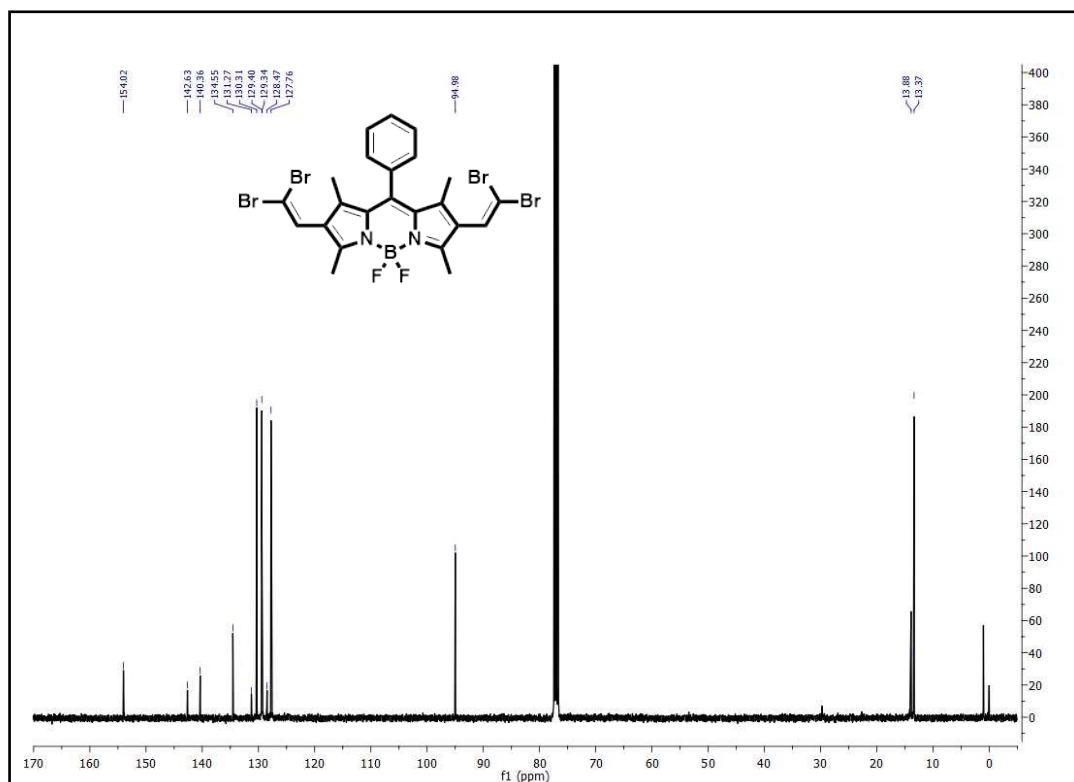

# HRMS Spectrum of BOD-1 and BOD-2

Theoretical BOD-1:

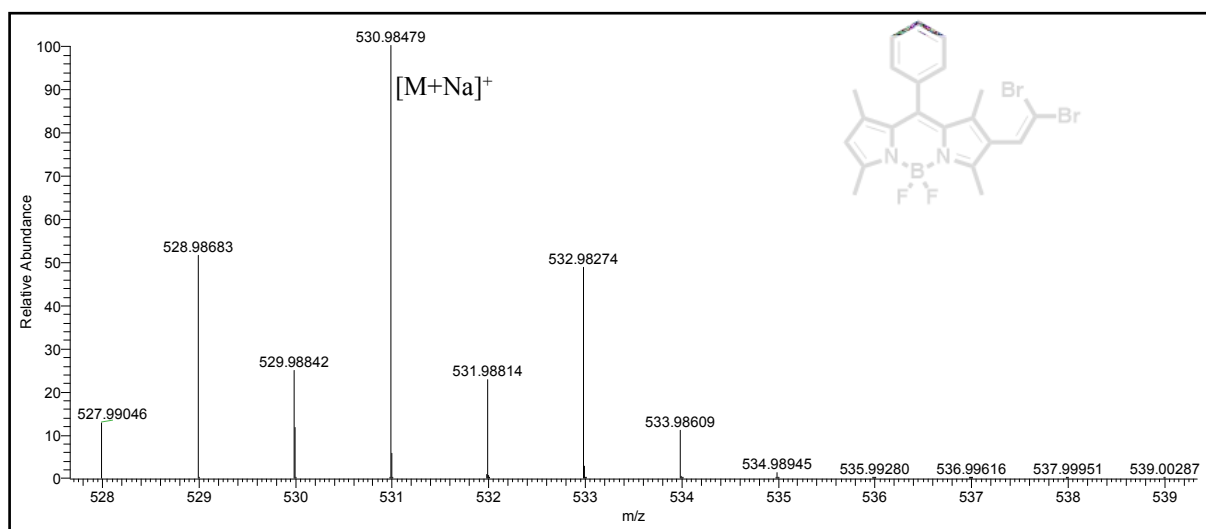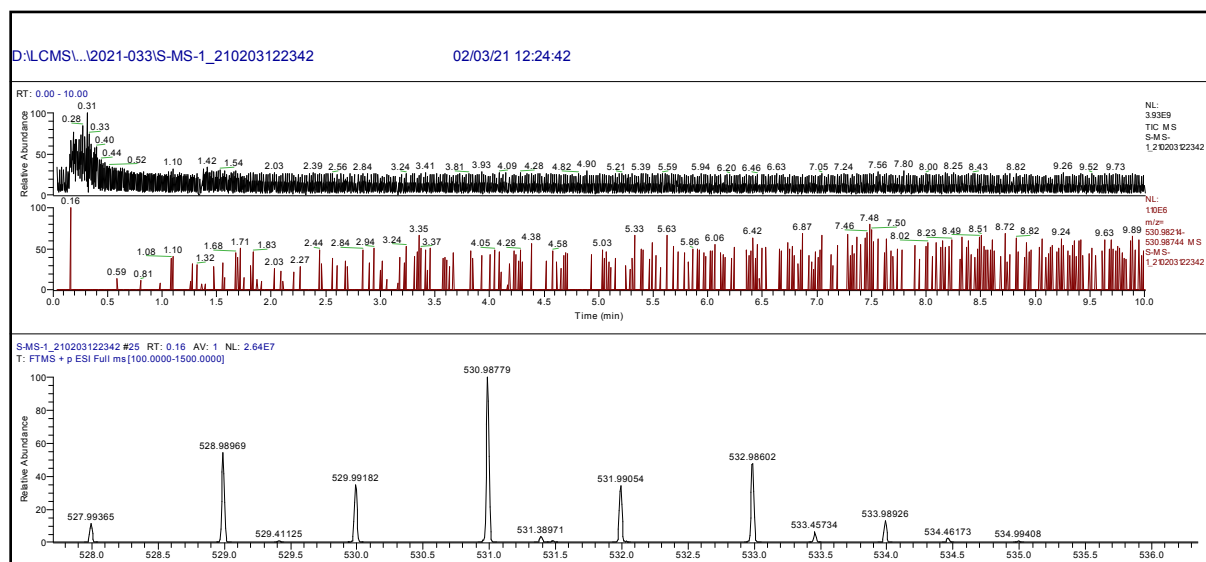

Table: Mass spectrum peak assignments and isotopic patterns of BOD-1

| BOD-1;<br>C <sub>21</sub> H <sub>19</sub> BBr <sub>2</sub> F <sub>2</sub> N <sub>2</sub> | m/z<br>(Theoretical) | m/z<br>(Found) | isotopes<br>[ <sup>x</sup> B, <sup>y</sup> Br, <sup>z</sup> Br] |
|------------------------------------------------------------------------------------------|----------------------|----------------|-----------------------------------------------------------------|
|                                                                                          | 527.99046            | 527.99365      | [ <sup>10</sup> B <sup>79</sup> Br <sup>79</sup> Br]            |
|                                                                                          | 528.98683            | 528.98969      | [ <sup>11</sup> B <sup>79</sup> Br <sup>79</sup> Br]            |
|                                                                                          | 529.98842            | 529.99182      | [ <sup>10</sup> B <sup>79</sup> Br <sup>81</sup> Br]            |
|                                                                                          | 530.98479            | 530.98779      | [ <sup>11</sup> B <sup>79</sup> Br <sup>81</sup> Br]            |
|                                                                                          | 531.98814            | 531.99054      | [ <sup>10</sup> B <sup>81</sup> Br <sup>81</sup> Br]            |
|                                                                                          | 532.98274            | 532.98602      | [ <sup>11</sup> B <sup>81</sup> Br <sup>81</sup> Br]            |
|                                                                                          | 533.98609            | 533.98926      | [ <sup>10</sup> B <sup>81</sup> Br <sup>81</sup> Br]            |

## Theoretical BOD-2:

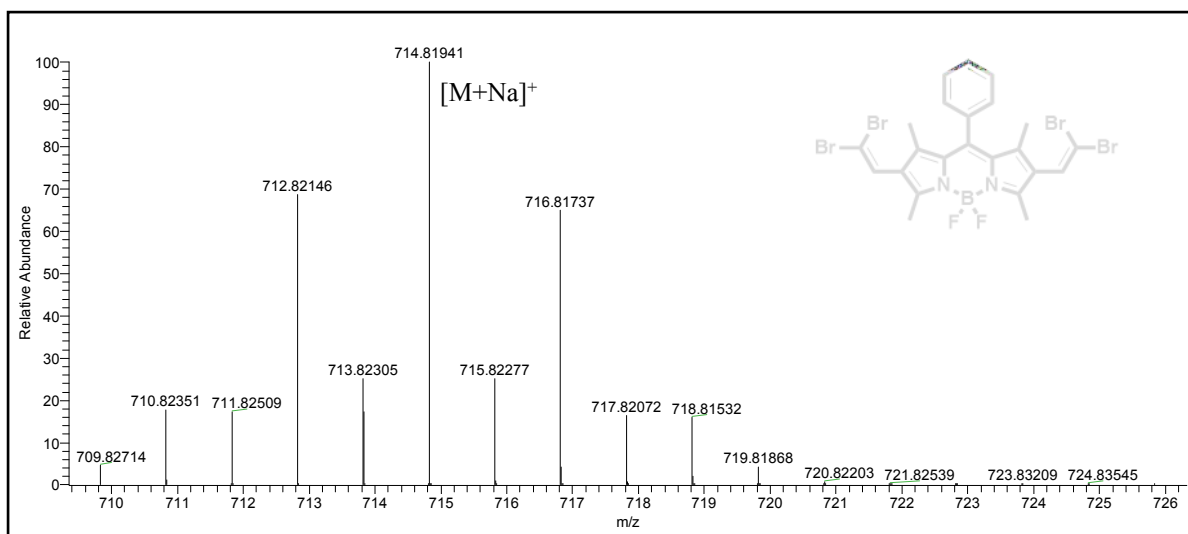

D:\LCMS\LCMS ham sonu\2021-03\3\S-MS-2

02/03/21 12:35:46

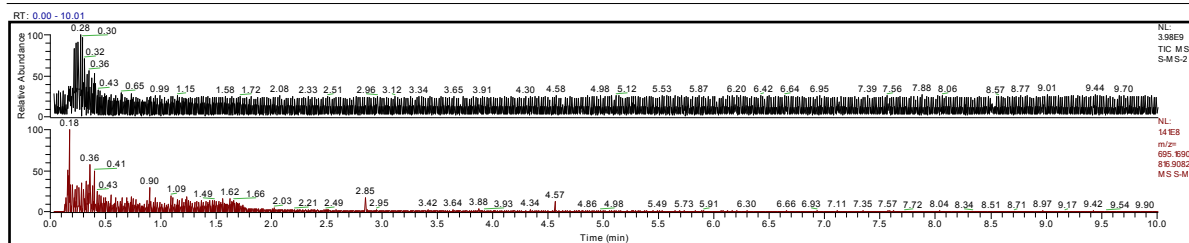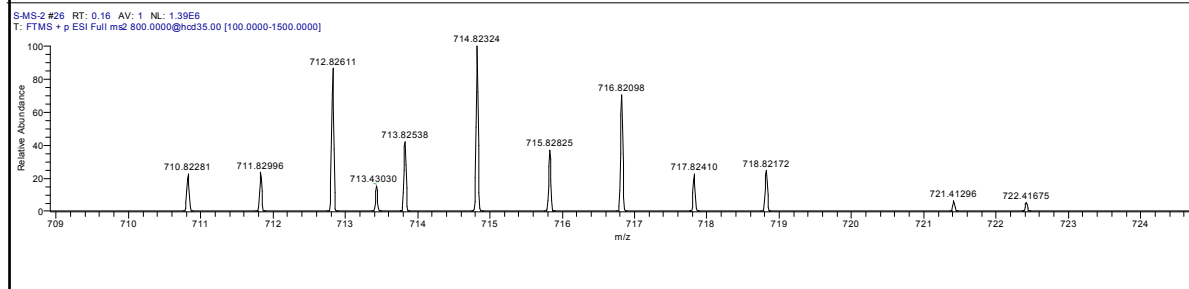

Table: Mass spectrum peak assignments and isotopic patterns of **BOD-2**

| BOD-2;<br>C <sub>21</sub> H <sub>19</sub> BBR <sub>2</sub> F <sub>2</sub> N <sub>2</sub> | m/z<br>(Theoretical) | m/z<br>(Found)                                                                        | isotopes<br>[ <sup>x</sup> B, <sup>y</sup> Br, <sup>z</sup> Br, <sup>v</sup> Br, <sup>w</sup> Br] |
|------------------------------------------------------------------------------------------|----------------------|---------------------------------------------------------------------------------------|---------------------------------------------------------------------------------------------------|
|                                                                                          | 710.82351            | 710.82281                                                                             | [ <sup>11</sup> B <sup>79</sup> Br <sup>79</sup> Br <sup>79</sup> Br <sup>79</sup> B]             |
|                                                                                          | 711.82509            | 711.82996                                                                             | [ <sup>10</sup> B <sup>81</sup> Br <sup>79</sup> Br <sup>79</sup> Br <sup>79</sup> B]             |
|                                                                                          | 712.82146            | 712.82611                                                                             | [ <sup>11</sup> B <sup>81</sup> Br <sup>79</sup> Br <sup>79</sup> Br <sup>79</sup> B]             |
|                                                                                          | 713.82395            | 713.82538                                                                             | [ <sup>10</sup> B <sup>81</sup> Br <sup>81</sup> Br <sup>79</sup> Br <sup>79</sup> B]             |
|                                                                                          | 714.81941            | 714.82324                                                                             | [ <sup>11</sup> B <sup>81</sup> Br <sup>81</sup> Br <sup>79</sup> Br <sup>79</sup> B]             |
|                                                                                          | 715.82277            | 715.82825                                                                             | [ <sup>10</sup> B <sup>81</sup> Br <sup>81</sup> Br <sup>81</sup> Br <sup>79</sup> B]             |
|                                                                                          | 716.81737            | 716.82093                                                                             | [ <sup>11</sup> B <sup>81</sup> Br <sup>81</sup> Br <sup>81</sup> Br <sup>79</sup> B]             |
|                                                                                          | 717.82072            | 717.82410                                                                             | [ <sup>10</sup> B <sup>81</sup> Br <sup>81</sup> Br <sup>81</sup> Br <sup>81</sup> B]             |
| 718.81532                                                                                | 718.82172            | [ <sup>11</sup> B <sup>81</sup> Br <sup>81</sup> Br <sup>81</sup> Br <sup>81</sup> B] |                                                                                                   |

Referenc  
es

1. M  
. Isik, T.  
Ozdemir, S.  
I. Turan, S.

Kolemen, E. U. Akkaya, Org. Lett. 2013, **15**, 216–219.

2. J. Kang, F. Huo, Y. Yue, Y. Wen, J. Chao, Y. Zhang, C. A. Yin, *Dyes and Pigm.* 2017, **136**, 852–858.
3. Y. Q. Fang, O. Lifchits and M. Lautens, *Synlett*, 2008, **3**, 413–417.
4. A. M. Brouwer, *Pure Appl. Chem.*, 2011, **83**, 2213–2228.
5. L. Huang and J. Zhao, *RSC Adv.*, 2013, **3**, 23377–23388.
